# Supplementary material for: Syntheses and characterization of bis(trifluoromethyl)phosphino naphthalenes and acenaphthenes
Source: Royal Society of Chemistry journal article supplement (doi:10.1039/b916425a), 2009-11-05
Supplement: b916425a.pdf [file b916425a.pdf]

Electronic Supplementary Information for Dalton Transactions  
This journal is © The Royal Society of Chemistry 2010

|                            |               |
|----------------------------|---------------|
| $\alpha/^\circ$            | 86.224(15)    |
| $\beta/^\circ$             | 88.075(13)    |
| $\gamma/^\circ$            | 80.615(15)    |
| $V/\text{\AA}^3$           | 490.1(2)      |
| $Z$                        | 1             |
| Reflections<br>collected   | 3236          |
| Reflections<br>independent | 1746 (0.0322) |
| $(R_{int})$                |               |
| $R (F^2, \text{all data})$ | 0.0776        |
| Flack parameter            | n/a           |

---

<sup>1</sup> G. M. Brooke, J. A. Cooper, J. A. K. Howard, D. S. Yufit, *J. Fluorine Chem.*, 1998, **88**, 191-194.
